# Supplementary material for: Efficient Targeting and Activation of Antigen-Presenting Cells In Vivo after Modified mRNA Vaccine Administration in Rhesus Macaques
Source: PubMed Central journal article supplement — Mol Ther. 2017 Aug 12;25(12):2635–47. doi: 10.1016/j.ymthe.2017.08.006 (PMC5768558; doi:10.1016/j.ymthe.2017.08.006), 2017-08-12
Supplement: mmc1.pdf [file mmc1.pdf]

YMTHE, Volume 25

## **Supplemental Information**

### **Efficient Targeting and Activation of Antigen- Presenting Cells In Vivo after Modified mRNA Vaccine Administration in Rhesus Macaques**

**Frank Liang, Gustaf Lindgren, Ang Lin, Elizabeth A. Thompson, Sebastian Ols, Josefine Röhss, Shinu John, Kimberly Hassett, Olga Yuzhakov, Kapil Bahl, Luis A. Brito, Hugh Salter, Giuseppe Ciaramella, and Karin Loré**

## SUPPLEMENTAL INFORMATION

Figure S1

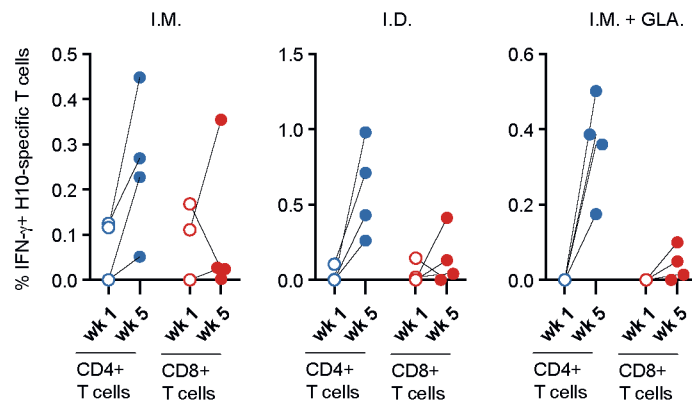

**Figure S1. IFN- $\gamma$  responses by H10-specific CD4+ and CD8+ T cells after prime and boost immunization.** Rhesus macaques received either intramuscular (I.M.) or intradermal (I.D.) prime and boost immunizations with LNP/H10 mRNA with or without GLA adjuvant at week 0 and 4 respectively. PBMCs collected one week after prime (open) or boost (filled) were stimulated with H10 peptides for analysis of H10-specific IFN- $\gamma$  production by total memory CD4+ T cells (blue) vs. CD8+ T cells (red) (n=4/group). Each connected circles show the percentages of IFN- $\gamma$ + T cells from an individual animal at the indicated week.

**Figure S2**

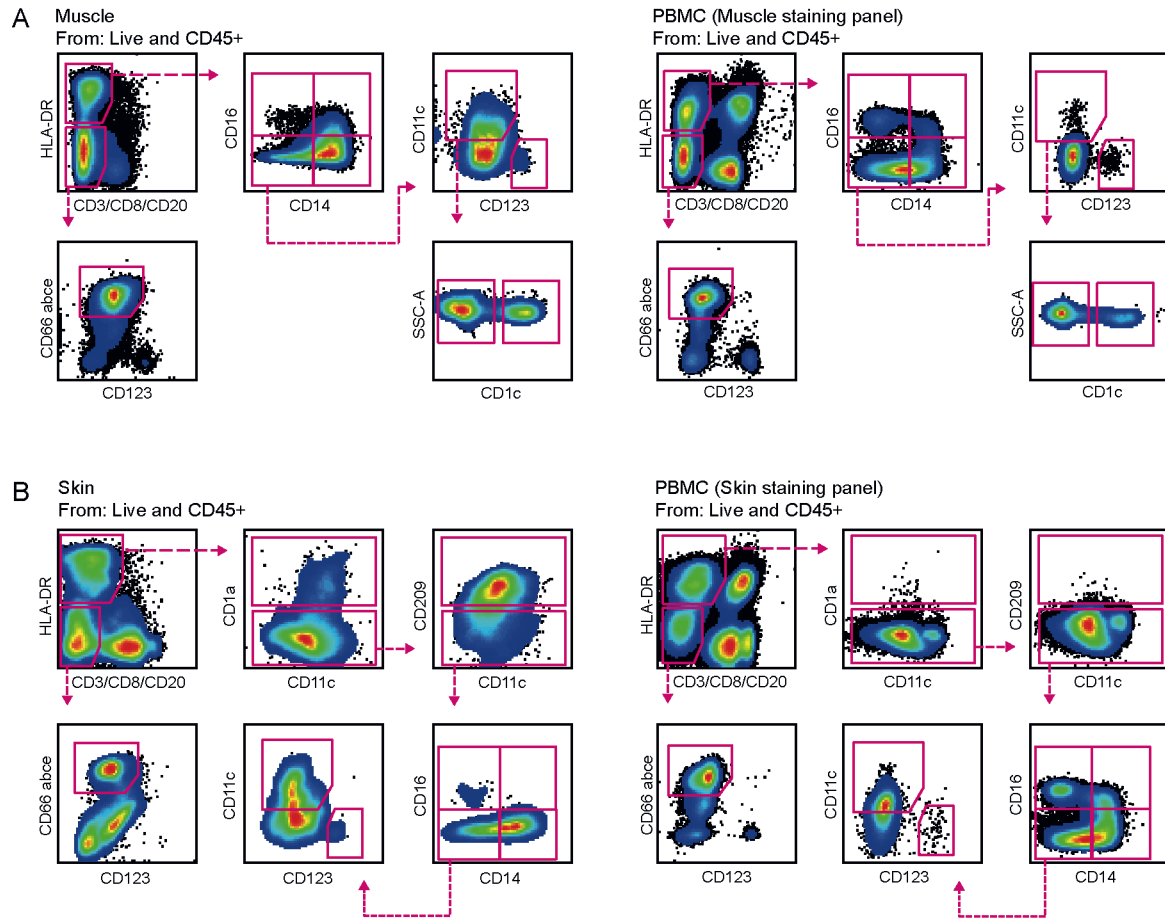

**Figure S2. Gating strategy of rhesus macaque immune cell subsets at immunization sites.** (A and B) Cell suspensions obtained from processed muscle (A) and skin (B) biopsies collected at the LNP/mRNA injection sites were stained with indicated panels. PBMCs were stained in parallel for reference.

**Figure S3**

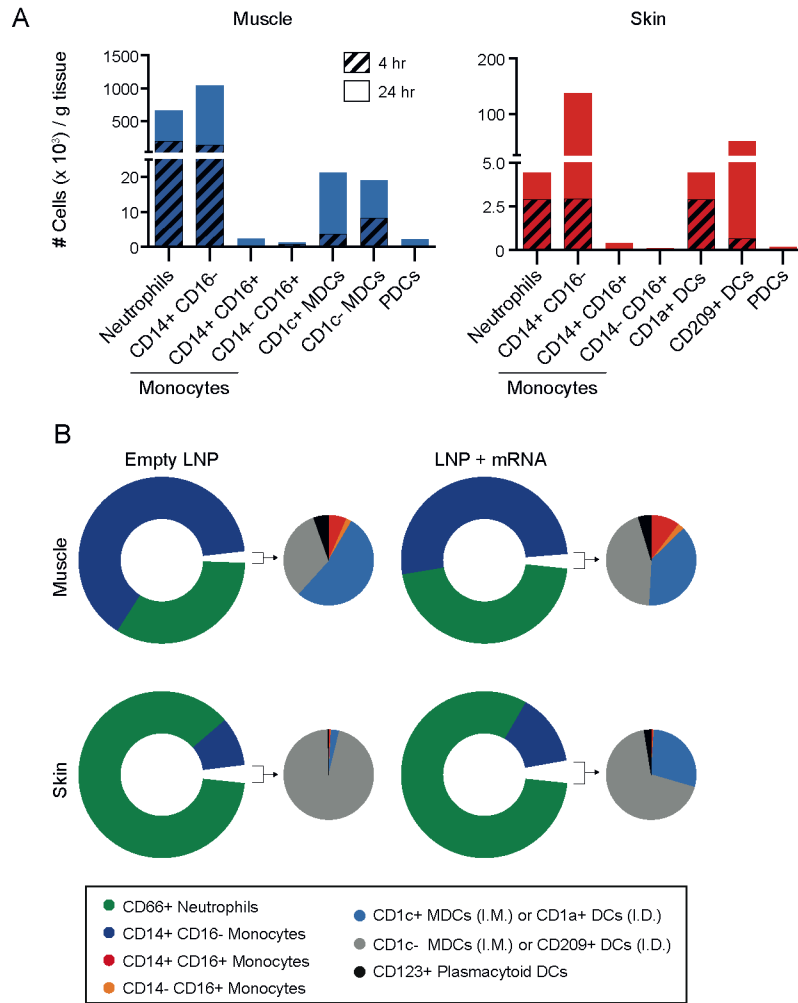

**Figure S3. Immune cell infiltrating the sites of empty LNP vs. LNP/mRNA administration.** Muscle and skin injected with LNP without mRNA content (Empty LNP) or LNP/mRNA were sampled for phenotyping of infiltrating immune cells. (A) The number of specific cell subsets in the empty LNP-injected muscle (blue) or skin (red) at 4 hrs (hatched bars, n=3/group) or 24 hrs (n=2/group). (B) Pie charts representing the proportions of different cell subsets mobilized to the muscle or skin at 24 hrs post-injection with empty LNP vs. LNP/mRNA (n=5/group). Proportions of infiltrating cell subsets found in lower frequencies are shown by the smaller pie charts and the doughnut charts depict the more abundant cell types.

**Figure S4**

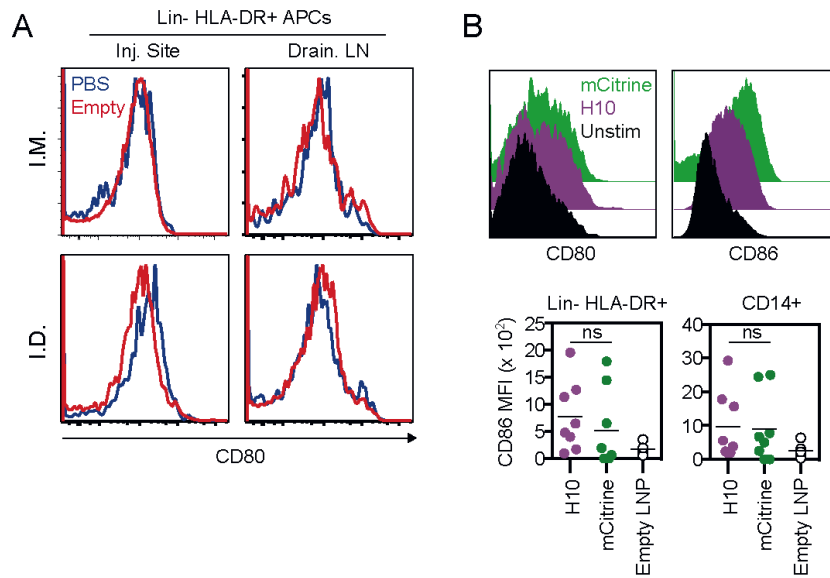

**Figure S4. Cellular activation by vaccine mRNA is independent of the encoded protein.** (A) Histogram on CD80 expression by HLA-DR+ Lin (CD3/CD8/CD20)- APCs at the PBS (blue) vs. Empty LNP (red) sites from the same animals. (B) Histograms of CD80 or CD86 expression by HLA-DR+ Lin- APCs after *in vitro* stimulation with LNP containing mRNA encoding H10 or mCitrine. Compiled data on background (i.e. media only) subtracted CD86 MFI values from stimulated HLA-DR+ Lin- APCs or CD14+ monocytes, (n = 8). Bars represent the mean, ns (not significant). Wilcoxon signed rank test.

**Figure S5**

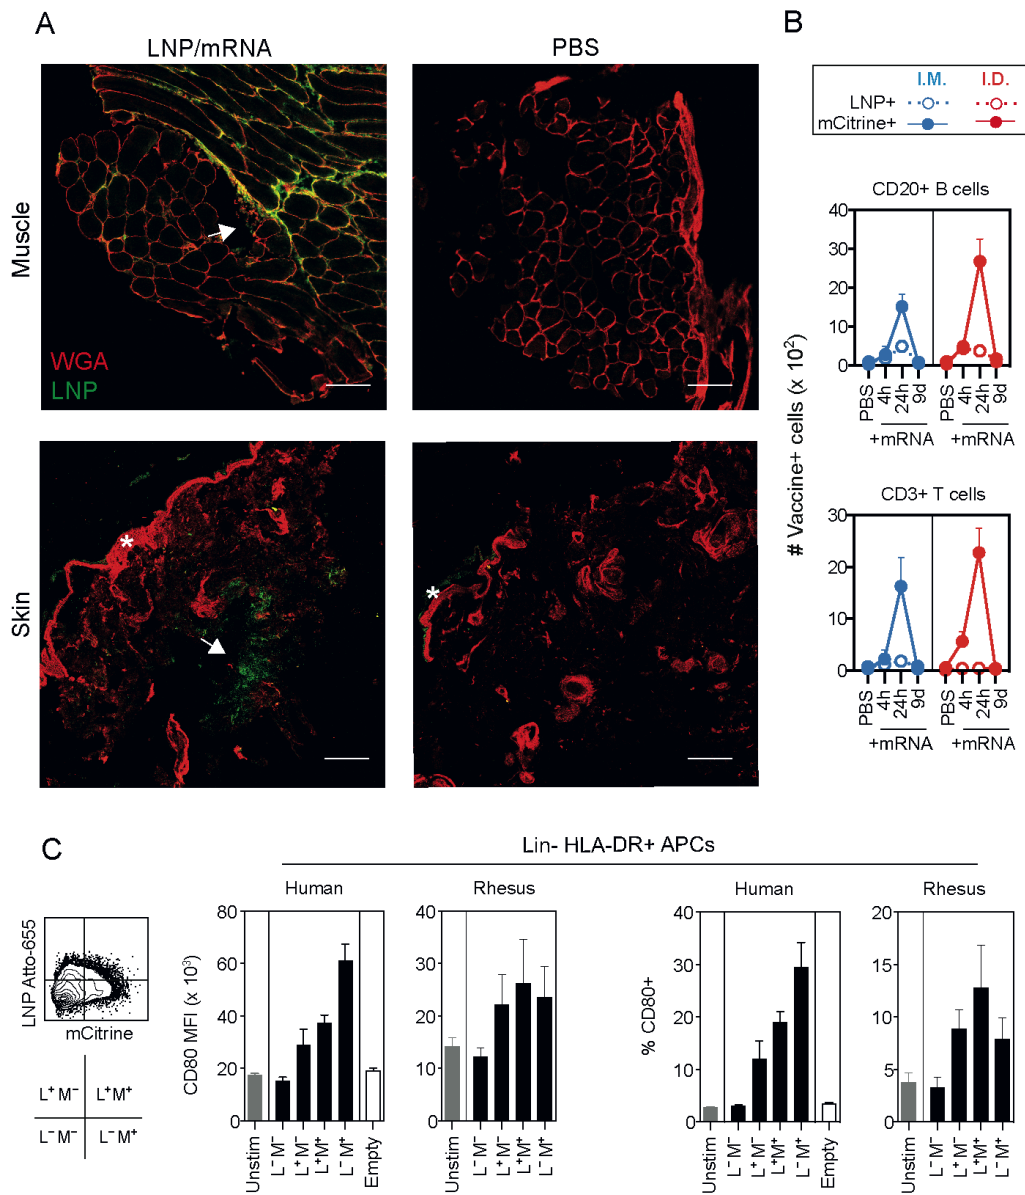

**Figure. S5. LNP/mRNA distribution and targeting of lymphocytes in vivo and APCs in vitro.** (A) Images of muscle and skin at 4 hrs post LNP/mRNA injection. Arrows indicate the distribution of LNPs labeled with Atto-647 or 655 (green) and cell membrane is visualized with wheat germ agglutinin (red). Asterisk denotes epidermis of the skin. Scale bars: 200  $\mu$ m. (B) LNP<sup>+</sup> and mCitrine<sup>+</sup> T cells and B cells in the draining LNs at the indicated time points. Open and closed circles denote mean  $\pm$  SEM of LNP<sup>+</sup> and mCitrine<sup>+</sup> cells respectively. (C) CD80 expression *in vitro* on four populations of human (n = 5) and rhesus (n = 4) HLA-DR<sup>+</sup> Lin<sup>-</sup> APCs according to vaccine uptake and translation as shown in the gating key. Mean  $\pm$  SEM shown.

**Table S1. Fluorescently labeled antibodies for flow cytometry.**

| <b>Marker</b>      | <b>Clone</b> | <b>Company</b>  |
|--------------------|--------------|-----------------|
| CD1a               | SK9          | BD Biosciences  |
| CD1c (BDCA-1)      | AD5-8E7      | Miltenyi Biotec |
| CD11c              | 3.9          | Biolegend       |
| CD123              | 7G3          | BD Biosciences  |
| CD14               | M5E2         | Biolegend       |
| CD16               | 3G8          | BD Biosciences  |
| CD20               | L27          | BD Biosciences  |
| CD209 (DC-SIGN)    | DCN46        | BD Biosciences  |
| CD3                | SP34-2       | BD Biosciences  |
| CD4                | L200         | BD Biosciences  |
| CD45               | D058-1283    | BD Biosciences  |
| CD45RA             | L48          | BD Biosciences  |
| CD66 biotin        | TET2         | Miltenyi Biotec |
| Streptavidin-BV421 | -            | Biolegend       |
| CD8                | RPA-T8       | BD Biosciences  |
| CD80               | L307.4       | BD Biosciences  |
| CD86               | IT2.2        | BD Biosciences  |
| HLA-DR             | TU36         | Invitrogen      |
| IFN alpha          | LT27:295     | Miltenyi Biotec |
| IFN gamma          | 4S.B3        | BD Biosciences  |
| IL-2               | MQ1-17H12    | BD Biosciences  |
| TNF                | MAb11        | Biolegend       |
